# Supplementary material for: Transcriptome and DNA methylome analyses reveal underlying mechanisms for the racial disparity in uterine fibroids
Source: PubMed Central journal article supplement (PMC9714787; doi:10.1172/jci.insight.160274), 2022-10-24
Supplement: jciinsight-7-160274-s007.pdf [file jciinsight-7-160274-s007.pdf]

# Figure S1

**A**

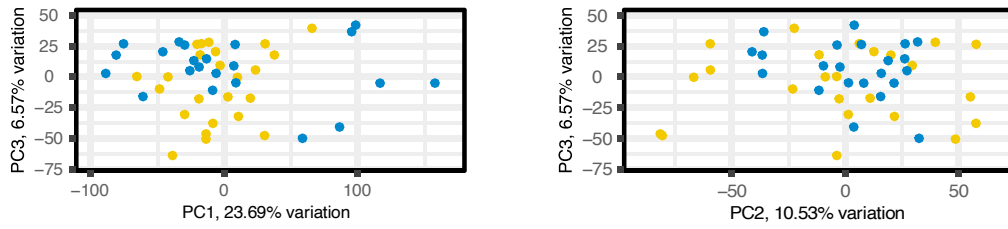

**B**

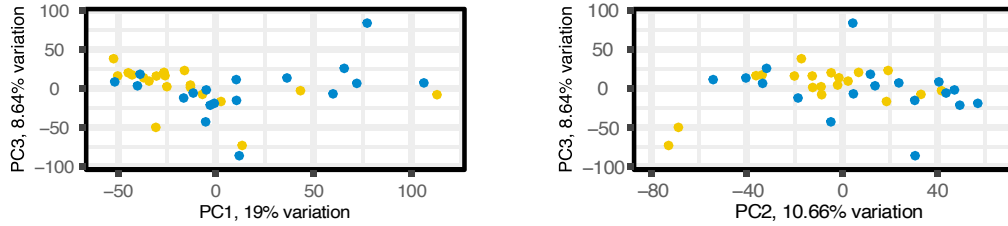

■ B  
■ W

**C**

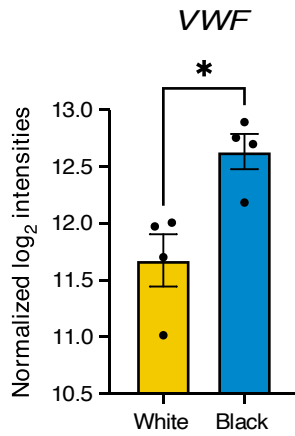

Figure S1. Principal component analyses of RNA-seq results from Fibroids (**A**) and Myometrial (**B**) samples from Black and White women. (**C**) Microarray results (GSE193320; Chuang, T.D., et al., *Differential Expression of Super-Enhancer-Associated Long Non-coding RNAs in Uterine Leiomyomas*. *Reprod Sci*, 2022.) for VWF expression in myometrial samples from Black and White women. \* $p < 0.05$  by two-tailed student t test.

**Figure S2**

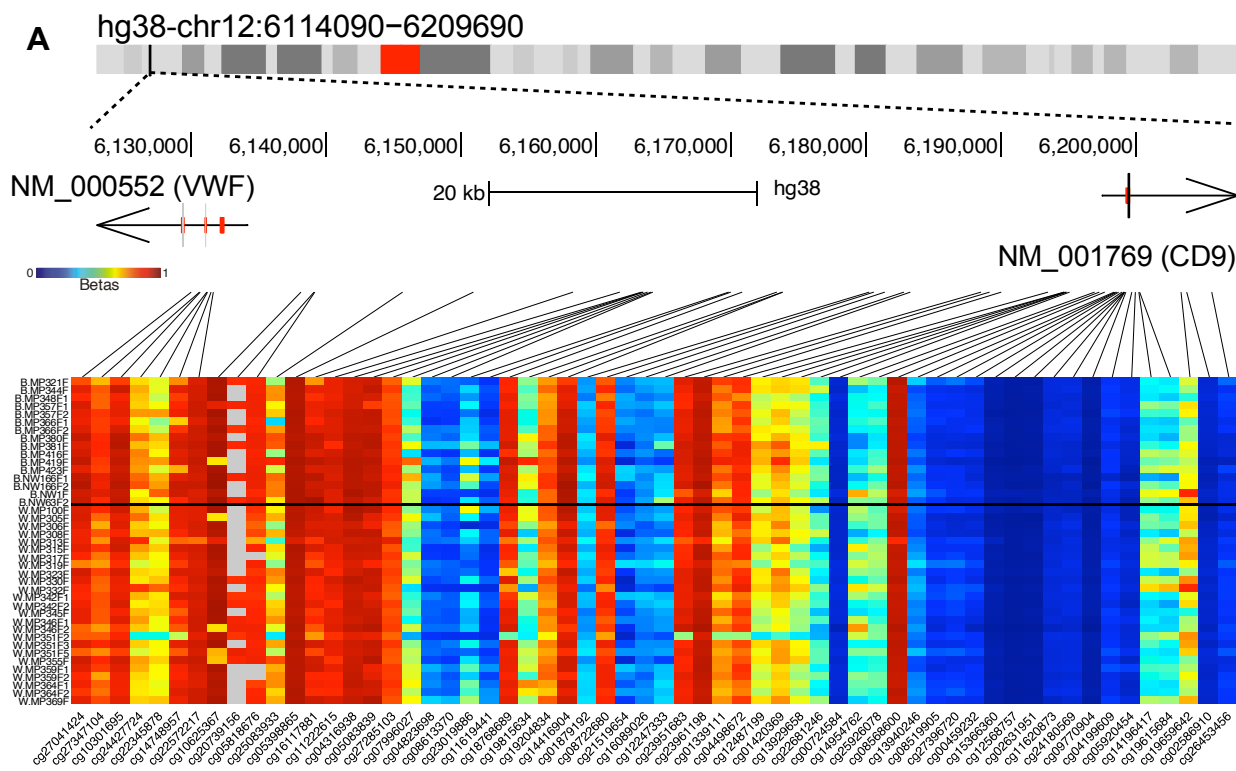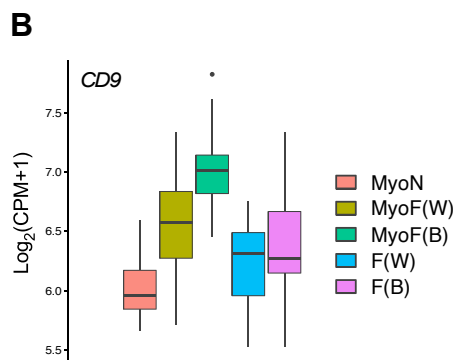

Figure S2. DNA methylation at the VWF and CD9 genes. **(A)** Heatmap of the CpG probes methylation beta values in fibroids. The white box indicates the position of the 2 CpG probes that are differentially methylated in myometrial samples (Fig 5). The black line separates fibroid samples from Black and White women. **(B)** Box and whisker plot for CD9 expression.
